# Supplementary material for: Global analysis of Drosophila Cys2-His2 zinc finger proteins reveals a multitude of novel recognition motifs and binding determinants
Source: HighWire-hosted journal article supplement (doi:10.1101/gr.151472.112), 2013-03-07
Supplement: Supplemental_Table_1.xlsx [file Supplemental_Table_1.xlsx]

## Sheet: Sheet1
uniprot number	CG name	number of fingers	number of canonical linkers	number of clusters	RNA Binding?
Bap170-PA	CG3274	1	0	1
Br140	CG1845	1	0	1
CG10754-PA	CG10754	1	0	1	Yes
CG11586-PA	CG11586	1	0	1	Yes
CG11984-PD	CG11984	1	0	1
CG12682-PA	CG12682	1	0	1
CG13617-PA	CG13617	1	0	1
CG14117-PA	CG14117	1	0	1
CG14200-PA	CG14200	1	0	1
CG15286-PA	CG15286	1	0	1
CG15435-PA	CG15435	1	0	1
CG15715	CG15715	1	0	1
CG16899-PB	CG16899	1	0	1
CG17361-PA	CG17361	1	0	1
CG18081-PA	CG18081	1	0	1
CG31381-PA	CG31381	1	0	1	Yes
CG31642-PA	CG31642	1	0	1
CG3224-PA	CG3224	1	0	1	Yes
CG32719-PA	CG32719	1	0	1
CG4133-PA	CG4133	1	0	1
CG4887-PA	CG4887	1	0	1	Yes
CG4896-PD	CG4896	1	0	1	Yes
CG6701-PA	CG6701	1	0	1
CG7271	CG7271	1	0	1
CG8209-PA	CG8209	1	0	1
CG9425-PA	CG9425	1	0	1
chinmo-PD	CG31666	1	0	1
Dip1-PA	CG15367	1	0	1
elB-PA	CG4220	1	0	1
FoxP	CG43067	1	0	1
Glut4EF	CG34360	1	0	1
key-PA	CG16910	1	0	1
kin17-PA	CG5649	1	0	1
MBD-R2-PB	CG10042	1	0	1
mkg-p-PA	CG7163	1	0	1
MTA1-like-PA	CG2244	1	0	1
noc-PA	CG4491	1	0	1
noi-PA	CG2925	1	0	1
Rbsn-PA	CG8506	1	0	1
sbb-PA	CG5580	1	0	1
scat-PA	CG3766	1	0	1
spn-E-PA	CG3158	1	0	1
Su(z)12	CG8013	1	0	1
term	CG4216	1	0	1
Trl-PA	CG33261	1	0	1
br-PC	CG11491	2	0	1
CG11317-PA	CG11317	2	0	1
CG12236-PA	CG12236	2	0	1
CG13287-PA	CG13287	2	0	1
CG14441	CG14441	2	0	1
CG15446	CG15446	2	0	1
CG17912-PA	CG17912	2	0	1
CG31835-PA	CG31835	2	0	1
CG32121-PB	CG32121	2	0	1
CG3526-PA	CG3526	2	0	1
CG42458	CG42458	2	0	1	Yes
disco-PA	CG9908	2	0	1
drm-PB	CG10016	2	0	1
fru-PI	CG14307	2	0	1
l(2)k10201	CG13951	2	0	1
lola-PI	CG12052	2	0	1
Nufip-PA	CG4076	2	0	1	Yes
polybromo-PA	CG11375	2	0	1
seq	CG32904	2	0	1
ttk-PE	CG1856	2	0	1
CG15514-PA	CG15514	2	0	2
CG15725-PA	CG15725	2	0	2
CG2790-PA	CG2790	2	0	2	Yes
CG31510-PA	CG31510	2	0	2
CG5316-PC	CG5316	2	0	2	Yes
CG6470-PA	CG6470	2	0	2
CG6765-PA	CG6765	2	0	2
CG7512-PB	CG7512	2	0	2
CG8108-PB	CG8108	2	0	2
not-PB	CG4166	2	0	2
Su(var)3-7	CG8599	2	0	2
ab-PB	CG4807	2	1	1
CG11966-PA	CG11966	2	1	1
CG4374-PA	CG4374	2	1	1
CG6813-PB	CG6813	2	1	1
CG12744-PA	CG12744	3	0	1
CG13123-PA	CG13123	3	0	1
CG14451-PA	CG14451	3	0	1
CG1647-PA	CG1647	3	0	1
CG12054-PA	CG12054	3	0	2
CG17186-PA	CG17186	3	0	2
CG18446-PA	CG18446	3	0	2
nerfin-1-PA	CG13906	3	0	2
nerfin-2-PA	CG12809	3	0	2
tef-PA	CG8961	3	0	2
Cf2-PC	CG11924	3	0	3
CG8478-PB	CG8478	3	0	3
Pep-PB	CG6143	3	0	3
tsh-PA	CG1374	3	0	3
Zn72D-PA	CG5215	3	0	3	Yes
CG4318-PA	CG4318	3	1	1
CG7691-PA	CG7691	3	1	1
jing-PG	CG9397	3	1	1
ken-PA	CG5575	3	1	1
ATbp-PA	CG17172	3	1	2
CG12071-PB	CG12071	3	1	2
mamo	CG34346	3	1	2
btd-PA	CG12653	3	2	1
Bteb2-PA	CG2932	3	2	1
cbt-PA	CG4427	3	2	1
CG10348-PA	CG10348	3	2	1
CG42741	CG9895	3	2	1
dar1	CG12029	3	2	1
hkb-PA	CG9768	3	2	1
luna-PB	CG33473	3	2	1
Sp1-PB	CG1343	3	2	1
Spps	CG5669	3	2	1
sr-PA	CG7847	3	2	1
CG12391-PA	CG12391	4	0	1
CG14962-PA	CG14962	4	0	1
CkIIalpha-i1-PA	CG6215	4	0	1
her-PA	CG4694	4	0	1
CG15710-PA	CG15710	4	0	2
disco-r-PA	CG32577	4	0	2
cas-PA	CG2102	4	0	4
CG1231-PA	CG1231	4	0	4	Yes
CG17098-PA	CG17098	4	0	4
CG6769-PA	CG6769	4	0	4	Yes
CG9890-PA	CG9890	4	0	4
tio-PA	CG12630	4	0	4
Cp190-PA	CG6384	4	1	1
CG3847-PA	CG3847	4	1	2
CG4820-PA	CG4820	4	1	2
CG13296-PA	CG13296	4	1	3
CG33213-PA	CG33213	4	1	3
CG15336-PB	CG15336	4	2	1
klu-PA	CG12296	4	2	1
ovo-PA	CG6824	4	2	1
pad-PA	CG10309	4	2	1
pho-PA	CG17743	4	2	1
phol-PA	CG3445	4	2	1
CG12219-PA	CG12219	4	2	2
Aef1-PA	CG5683	4	3	1
CG17801-PA	CG17801	4	3	1
CG7368-PB	CG7368	4	3	1
Kr-PA	CG3340	4	3	1
l(3)neo38-PA	CG6930	4	3	1
odd-PA	CG3851	4	3	1
sens-PA	CG32120	4	3	1
CG10321-PA	CG10321	5	0	1
row	CG8092	5	0	2
CG1024-PB	CG1024	5	0	3
CG11414-PA	CG11414	5	0	3
CG11122-PA	CG11122	5	0	5
CG7357-PA	CG7357	5	1	1
CG10631-PA	CG10631	5	1	2
CG12605-PB	CG12605	5	2	1
CG14667-PB	CG14667	5	2	1
CG1529-PA	CG1529	5	2	1
CG17181-PA	CG17181	5	2	1
esg-PA	CG3758	5	2	1
scrt-PA	CG1130	5	2	1
sna-PA	CG3956	5	2	1
CG9650-PA	CG9650	5	2	2
CG7963-PA	CG7963	5	2	3
CG17802-PA	CG17802	5	3	1
CG17806-PA	CG17806	5	3	1
CG8145-PA	CG8145	5	3	1
CG8159-PA	CG8159	5	3	1
ci-PA	CG2125	5	3	1
lmd-PA	CG4677	5	3	1
opa-PA	CG1133	5	3	1
sqz-PA	CG5557	5	3	1
sug-PA	CG3850	5	3	1
CG17359-PA	CG17359	5	3	2
CG3065-PC	CG3065	5	3	2
Blimp-1-PA	CG5249	5	4	1
bowl-PB	CG10021	5	4	1
CG11762-PA	CG11762	5	4	1
CG14710-PB	CG14710	5	4	1
CG14711-PA	CG14711	5	4	1
CG1792-PA	CG1792	5	4	1
CG18764-PA	CG18764	5	4	1
CG31441-PA	CG31441	5	4	1
CG44003-PA	CG44003	5	4	1
CG4424-PA	CG4424	5	4	1
CG4854-PA	CG4854	5	4	1
CG4936-PA	CG4936	5	4	1
CG6808-PA	CG6808	5	4	1
CG9215-PA	CG9215	5	4	1
CG9797-PA	CG9797	5	4	1
gl-PA	CG7672	5	4	1
ranshi	CG9793	5	4	1
sob-PA	CG3242	5	4	1
trem-PA	CG4413	5	4	1
Zif	CG10267	5	4	1
CG10654-PA	CG10654	6	1	1
CG4730-PA	CG4730	6	1	1
CG10431-PA	CG10431	6	1	3
chn-PC	CG11798	6	1	3
E(var)3-9	CG11971	6	1	3
CG10979-PA	CG10979	6	1	4
CG30431-PA	CG30431	6	2	1
CG31365-PA	CG31365	6	2	1
Sry-beta-PA	CG7938	6	2	1
CG11071-PA	CG11071	6	2	2
CG43347	CG9817	6	2	2
wor-PA	CG4158	6	2	2
vfl-PB	CG12701	6	2	3
CG16779-PA	CG16779	6	2	4
CG1663-PA	CG1663	6	3	1
rn-PF	CG42277	6	3	1
hb-PB	CG9786	6	3	2
CG4496-PA	CG4496	6	3	3
MTF-1-PA	CG3743	6	4	1
wek-PA	CG4148	6	4	1
CG17328-PA	CG17328	6	4	2
CG44002-PA	CG44002	6	4	2
erm	CG31670	6	5	1
sens-2-PA	CG31632	6	5	1
CG2199-PB	CG2199	7	0	3
MEP-1	CG1244	7	1	2
pzg-PA	CG7752	7	1	3
CG31392-PA	CG31392	7	2	1
CG2678-PA	CG2678	7	2	2
Lin29	CG2052	7	2	2
CG11906-PA	CG11906	7	2	3
CG2116-PA	CG2116	7	3	1
CG32767-PA	CG32767	7	3	1
CG7928-PA	CG7928	7	3	1
CG1603-PA	CG1603	7	3	2
CG8319-PA	CG8319	7	3	2
mld-PA	CG34100	7	3	2
Sry-delta-PA	CG17958	7	3	2
CG12769-PB	CG12769	7	3	3
salm-PA	CG6464	7	3	3
CG17568-PA	CG17568	7	4	1
CG17385-PA	CG17385	7	4	2
CG17803-PA	CG17803	7	4	2
CG6689-PA	CG6689	7	4	2
CG11398-PA	CG11398	7	5	1
CG1832-PA	CG1832	7	5	2
CG2120-PB	CG2120	7	5	2
CG3407-PA	CG3407	7	5	2
ush-PA	CG2762	8	1	7
az2-PA	CG1605	8	2	2
CG8944-PB	CG8944	8	2	3
CG5204-PA	CG5204	8	2	4
CG8089-PA	CG8089	8	2	4
CG10366-PA	CG10366	8	3	1
CG31388-PA	CG31388	8	3	1
CG6792-PA	CG6792	8	3	1
salr-PA	CG4881	8	3	4
shn-PA	CG7734	8	3	5
CG6254-PA	CG6254	8	4	1
CG1602-PA	CG1602	8	4	2
Neu2-PA	CG7204	8	4	3
CG14655-PA	CG14655	8	4	4
CG3281-PA	CG3281	8	4	4
CG15269-PA	CG15269	8	5	1
CG32772-PA	CG32772	8	5	2
wdn-PA	CG1454	8	6	1
CG2712-PA	CG2712	8	6	2
Kr-h1-PA	CG18783	8	6	2
rgr-PA	CG8643	8	6	2
CG15436-PA	CG15436	8	7	1
dwg-PA	CG2711	8	7	1
grau-PA	CG33133	9	1	2
MESR4-PA	CG4903	9	1	5
CG17612-PB	CG17612	9	2	1
CG3032-PA	CG3032	9	2	1
CG11696-PA	CG11696	9	2	2
CG11456-PA	CG11456	9	2	3
CG9609-PA	CG9609	9	3	1
CG11695-PA	CG11695	9	3	2
CG7101-PA	CG7101	9	3	2
Opbp-PA	CG30443	9	3	4
zfh1-PB	CG1322	9	3	4
CG10543-PA	CG10543	9	4	1
CG10462-PA	CG10462	9	4	3
CG10147-PA	CG10147	9	5	1
fu2-PA	CG9233	9	5	2
ham-PA	CG31753	9	5	2
CG18262-PA	CG18262	9	5	3
CG10274-PA	CG10274	9	6	2
CG10959-PA	CG10959	9	6	2
CG4360-PA	CG4360	9	6	3
CG7372-PA	CG7372	9	6	3
jim-PC	CG11352	9	7	2
CG18265-PA	CG18265	10	0	9
CG17829-PA	CG17829	10	2	3
CG12942-PA	CG12942	10	3	1
CG1233-PB	CG1233	10	3	3
CG15073-PA	CG15073	10	4	1
CG4282-PA	CG4282	10	4	1
CG4707-PA	CG4707	10	4	1
topi-PA	CG8484	10	4	5
CG2889-PA	CG2889	10	5	1
CG8388-PA	CG8388	10	5	1
CG2129-PA	CG2129	10	5	3
CG6654-PA	CG6654	10	7	1
pita-PA	CG3941	10	7	1
CG31782-PB	CG31782	11	4	7
cg-PD	CG8367	11	6	3
CG12299-PA	CG12299	11	7	3
CTCF-PA	CG8591	11	8	1
CG11247-PB	CG11247	11	9	1
su(Hw)	CG8573	12	4	2
zf30C-PA	CG3998	12	4	3
Meics-PA	CG8474	12	7	1
CG7386-PA	CG7386	12	7	2
D19A-PA	CG10269	12	7	2
D19B-PA	CG10270	12	7	2
peb-PA	CG12212	13	4	7
CG8301-PA	CG8301	13	5	2
CG2202-PA	CG2202	13	6	2
CG31224-PA	CG31224	14	6	3
zfh2-PA	CG1449	15	1	14
CG30020-PA	CG30020	15	5	7
CG7987-PA	CG7987	15	6	5
CG5245-PA	CG5245	15	12	1
CG9932-PA	CG9932	16	3	9
CG18476-PA	CG18476	16	4	8
CG10669-PA	CG10669	17	2	7
CG31612-PA	CG31612	17	3	7
CG6791-PB	CG6791	18	1	8
crol-PA	CG14938	18	16	1
hang-PB	CG32575	19	0	11
CG18011-PA	CG18011	19	3	3
CG14438-PA	CG14438	21	2	12
Oaz-PB	CG17390	21	3	7
CG11902-PB	CG11902	24	6	11
