# Supplementary material for: Global analysis of Drosophila Cys2-His2 zinc finger proteins reveals a multitude of novel recognition motifs and binding determinants
Source: HighWire-hosted journal article supplement (doi:10.1101/gr.151472.112), 2013-03-07
Supplement: Supplemental_Table_2.xlsx [file Supplemental_Table_2.xlsx]

## Sheet: Sheet1
	CG name	Fragment AA seq
ab-PB	CG4807	VSRRSLEMRVRATDPRPCPKCGKIYRSAHTLRTHLEDKHTVCPGYRCVLCGTVAKSRNSLHSHMSRQHRGISTKDLPVLPMPSAFDPELASRLLAKAG
Aef1	CG5683	GSEKPFHCTVCDRRFRQLSTLTNHVKIHTGEKPYKCNVCDKTFRQSSTLTNHLKIHTGEKPYNCNFCPKHFRQLSTLANHVKIHTGEKPFECVICKKQFRQSSTLNNHIKIHVMDK
Blimp-1	CG5249	GKMHYECNVCCKTFGQLSNLKVHLRTHSGERPFKCNVCTKSFTQLAHLQKHHLVHTGEKPHQCDICKKRFSSTSNLKTHLRLHSGQKPYACDLCPQKFTQFVHLKLHKRLHTNDRPYVCQGCDKKYISASGLRTHWKTTSCKPNNLEEE
bowl	CG10021	SRPKKQFICKFCNRQFTKSYNLLIHERTHTDERPYSCDICGKAFRRQDHLRDHRYIHSKEKPFKCTECGKGFCQSRTLAVHKILHMEESPHKCPVCSRSFNQRSNLKTHLLTHTDHKPYECSSCGKVFRRNCDLRRHALTHAVGEVN
br-PA	CG11491	SGGINEPQECPYCRRTFSCYYSLKRHFQDKHEQSDTLYVCEFCHRRYRTKNSLTTHKSLQHRGSSGMLKR
br-PC	CG11491	SLLSSVRAQDVAQANRLLLPLPLNACHRCDVCGKLLSTKLTLKRHKEQQHLQPLNNAVCNLCHKVFRTLNSLNNHKSIYHRRQKNHHSYFHHGAGVSQAGSPGSRLHQS
br-PE	CG11491	SGGDDFRCNPCNKNLSSLTRLKRHIQNVHMRPTKEPVCNICKRVYSSLNSLRNHKSIYHRNLKQPK
br-PL	CG11491	KKLFSCQLCGKLLCSKASLKRHIADKHAVRQEEYRCAICERVYCSRNSLMTHIYTYHKSR
btd	CG12653	QHICHIPGCERLYGKASHLKTHLRWHTGERPFLCLTCGKRFSRSDELQRHGRTHTNYRPYACPICSKKFSRSDHLSKHKKTHFKDKK
bteb2	CG2932	QMSENAAGERGYLCTFGNCEKIYAKPAHLKAHLRRHLGEKPYVCSWPDCVWRFSRSDELARHKRSHSGVKPYKCDYCSKCFARSDHLTKHRKVHERRLLAASRAGR
Cf2-PA	CG11924	KIRHKCPDCPKTFKTPGTLAMHRKIHTGEADATPKERPYTCSYCGKSFTQSNTLKQHTRIHTGEKPFRCGYCGRAFTVKDYLNKHLTTHTGEKPFHCGYCEKSFSVKDYLTKHIRTHTGEKPYTCPYCDKRFTQRSALTVHTTKLHPL
Cf2-PB	CG11924	KIRHKCPDCPKTFKTPGTLAMHRKIHTGEADATPKERPYTCSYCGKSFTQSNTLKQHTRIHTGEKPFHCGYCEKSFSVKDYLTKHIRTHTGEKPYTCPYCDKRFTQRSALTVHTTKLHPL
CG10267	CG10267	TEKGGYICDVCGNFYEKRGRMMEHRRRHDGICQYACELCDAKFQVREQLRKHMYSHTGSKPYKCSFCSRQFFYESVLKSHENVHRGIKPYVCKVCDKAFAYAHSLTKHELIHSDIKLYRCDYCNKDFRLLHHMRQHEETKLHQNAVMLAES
CG11071	CG11071	GLNPQEASILNFLRVDAAERQRDKRPATSRFACPFCGKCVRSKENLKLHVRKHTGERPFVCLFCGRAFGGKSDLTRHLRIHTGERPYHCESCGKCFARADYLSKHLTTHIHNAPR
CG12029	CG12029	GTAAHIASLMSVRTVRYNRRNNPELEKRRIHHCDFVGCSKVYTKSSHLKAHQRIHTGEKPYTCQWPECEWRFARSDELTRHYRKHTGAKPFKCIVCERSFARSDHLALHMKRHLPKN
CG12236-PA	CG12236	PLNCSFCGRPLKSVNALRRHIASRHSEIQGKEHECFICMKSFKTKWSLSTHNSRFHRE
CG12236-PB	CG12236	KWTECQFCKMVITTVNLWRHIRTQHTPQPPRKCDMCNKNFKNKYSLREHIRISHEQK
CG12605	CG12605	ENYAKRKRGCYKCCECGKQYATSSNLSRHKQTHRSLDSQSAKKCNTCGKAYVSMPALAMHLLTHKLSHSCDICGKLFSRPWLLQGHLRSHTGEKPYACVHCGKAFADRSNLRAHMQTHSGDKNFKCHRCNKTFALKSYLNKHLESACLRDAGA
CG14962	CG14962	KHTPDIRELMPVREHRCERCPSLVFGNLSHYQLHLRRRHQEVIPPSVIGPIVAFHCPVEKCIYHVATKGARSFTSLRLLRQHYQKSHLDKNYKCLACGGKFLLQHHLEKHQCSKHKCPVCELTYNSKAGLRTHMRRKNH
CG17181	CG17181	EDEHICPECGKKYSTSSNLARHRQTHRSIMDKKARHCPYCEKVYVSMPAYSMHVRTHNQGCECQFCGKRFSRPWLLQGHIRTHTGEKPFKCGVCEKAFADKSNLRAHIQTHSNTKPHTCARCGKAFALKSYLYKHEESSCMKNR
CG2052	CG2052	DTKPHQCQQCMKSFSSNHQLVQHIRVHTGEKPYKCSYCDRRFKQLSHVQQHTRLHTGERPYKCHLPDCGRAFIQLSNLQQHLRNHDAQVERAKNRPFHCNICGKGFATESSLRTHTSKELQLHLGVLQQHAALIGGPNATSCPVCHKLFLGTEALVDHMKHVHKEKSPPPGGSASSQFSELNQIVTGNGNGTGSSNEQIATQCTTESNSHQATVGSSLIDSFLGKRRTANHPCPVCGKHYVNEGSLRKHLACHAENSQLTNSLRMWPCSVCQAVFTHENGLLTHMESMR
CG3065-PC	CG3065	TLASDPKRKFVCPYDNCTKSYGKSSHLRSHLTWHTGIKPFVCSEPKCGKGFTRSDELNRHLRTHTGEKPFECIQCTKKFSRSDHLTKHLATHDRQLKGSTPKRTVPSSSGGVRLKPPKKQIHSESDSGFHFMAAMVGCGEPSMKHHHQQQQHNQHQQPVSIIDIHHKPIKIKLERPEHSDKYQIVSPEHQMDNHGHNQSQLPDFLNQAKPEVKYEPTEEIVNTLSQLPPADGPGTYGMPQFVQDRPFYCRQCEKRFKRQDDLNRHIRTHTGEKPYACQQCCRRFVRSDHLKKHQQTHLKIR
CG31670	CG31670	KTFSCLECGKVFNAHYNLTRHMPVHTGARPFVCKVCGKGFRQASTLCRHKIIHTSEKPHKCQTCGKAFNRSSTLNTHSRIHAGYKPFVCEYCGKGFHQKGNYKNHKLTHSGEKAYKCNICNKAFHQVYNLTFHMHTHNDKKPYTCRVCAKGFCRNFDLKKHMRKLHE
CG31782-F9-11	CG31782	PSVKPHKCNDCSKLFRFKNQLTKHIQTHTGERPHQCPLCYWAFKQKHHLVRHMIVHTRYGPYKCFICQRSFKKQSLLRTHNSIHN
CG32830	CG32830	YMLPCPLCETPLEQRVFRQHLDRHYPRDSPVCPVIECGRRFAHPNSVRNHMRIKHTLQWAKMKAMRSSGGPFAGGPD
CG3407	CG3407	PSSLYSCEICGYAVHTQLDFFAHLKQHYEPTVLEQRLVVQDPQQQHQQKEPLDMCGLSAQDKLQQEQAKLDQVFQDVQLNFENFHNISHHVNDVANVGVNMVLHGQATDKLNAVVVNTSSTPNSVPVVDDVEFSDTEDMLEGIRNVVDKVSIEDTCDELVDLELTSSGMTAPWFNNNFRDITFPALLLPGEPPPASSEPATPLLKENPHVGDHMALDFLSPEKADPQEEAKLEKTLSKACEPNEQTLLVAPPACQTPPIPTVPPANSSIEQLRRSPLELSEAFKLEEDDMTDSRPASSFEEGDPDAEEPNECFQMEVLDTSLTEEAENKTRRKHFCDKCNRDFNSYNALKYHQYTHNQERSHKCDSCERSFYTQSALKAHERTHSGVKPFKCDKCEFQF…
CG4360-F1-3	CG4360	ISEEEVVVDDPRKKKQCHVCKNKFRQLTTLRNHMKIHTDERPYKCKHCDKAFRQISTLTNHVKIHTGEKPFTCNICAKDFRQQSTLINHIKTHKAAESSTPTSLLNYQ
CG4854	CG4854	SFTCNICNNVYSERVKLTNHMKVHSAKKPHECEICHKRFRQTPQLARHMNTHTGNRPYKCDYCDSRFADPSTRIKHQRIHTNERPYKCEFCSRSFGYSNVLRVHLKTHTGERPFSCQYCQKSFSQLHHKNSHEKSHK
CG5669	CG5669	EPKPRLKRVACTCPNCTDGEKHSDKKRQHICHITGCHKVYGKTSHLRAHLRWHTGERPFVCSWAFCGKRFTRSDELQRHRRTHTGEKRFQCQECNKKFMRSDHLSKHIKTHFKSRSGVELIELSIKQETK
CG7368	CG7368	LGTALDGSPLYMCPECHVAYPEPELLEVHLVGHNLEKRYVCDICQASLKRKDHLTRHKQSHNPERPYICTVCLKAFKRKEQLSLHFVIHSGEKRHQCGECGKGFYRKDHLRKHTRSHIARRVKAELNSHVRRENGTSMLQ
CG7928	CG7928	GEYTVNIQCPSCPEKFSSRRAYNVHTKREHFPGYVCDQCGKTLQSYSGFIGHLQNHEPVKQFACPVCPERFSRKFRLKHHMAWHSGETPYQCDVCSKRFVHKVALYKHKMIHDSETKRLECQVCGFKTRTKAHLERHMRSHTGDKPFACPVCNKRFSQMYNMKAHLREHESPGTNRHRRFHCSKCTHTFINEQNYDAHVQRDDCT
CG8319	CG8319	KNQTFKCELCIKQFKRQINLLDHMKVHSNSHVCQNCEERFLFKADLDNHQCYRNSNSTVECPECLKVFSSTQSLDSHKCKDMQERSPFQCPHCQQAFTREQNLKAHLLIHAESKQGNGPHKCSYCQTGFFNKSALKVHIHAHMGERPHACPFCVSNFRSKQALKVHIRIHTGEKPYQCPHCPKTFSDNNNLAKHRRRHSDERPYKCSICLQDFREKHHLKRHFLGKHRDGDQ
CG9895	CG9895	GGYNDLSKNRKVHKCDTEGCDKVYTKSSHLKAHKRTHTGEKPYVCTWEGCIWRFARSDELTRHYRKHTGVKPFRCQLCTRSFSRSDHLSLHMRRH
chinmo	CG31666	GTLLENLKADGTLSSNLAASIAPADMLNVWNATKMNNKNSVNTADGKKLKCLYCDRLYGYETNLRAHIRQRHQGIRVPCPFCERTFTRNNTVRRHIAREHKQE*SR
ci	CG2125	ANADTTDIKDEPGDFIETNCHWRSCRIEFITQDELVKHINNDHIQTNKKAFVCRWEDCTRGEKPFKAQYMLVVHMRRHTGEKPHKCTFEGCFKAYSRLENLKTHLRSHTGEKPYTCEYPGCSKAFSNASDRAKHQNRTHSNEKPYICKAPGCTKRYTDPSSLRKHVKTVHGAEFYANKKHKGLPLNDAN
crol-F7-16	CG14938	GQTPHQCDVCGKKYTRKEHLANHMRSHTNETPFRCEICGKSFSRKEHFTNHILWHTGETPHRCDFCSKTFTRKEHLLNHVRQHTGESPHRCSYCMKTFTRKEHLVNHIRQHTGETPFKCTYCTKAFTRKDHMVNHVRQHTGESPHKCTYCTKTFTRKEHLTNHVRQHTGDSPHRCSYCKKTFTRKEHLTNHVRLHTGDSPHKCEYCQKTFTRKEHLNNHMRQHSSDNPHCCNVCNKPFTRKEHLINHMSRCHTGDRPFTCETCGKSFPLKGNLLFHQRSHTKGQ
D19A-F10-12	CG10269	QLAGTAVNPIPSVSVPSWSPQVNFTKKEGQHICPGCGRGFNNIGNMKLHYKIIHEKVKDFACRFCPKRFSKAQILRHHEWIHTGEKPFECKICGKHFRQETALKKHIKTHEKPNRRHVPE
D19B-F10-12	CG10270	QVNFTKKEGQHICPDCGKGFNHVSNMKLHYKVVHQKVKDFCCRFCPKRFAKKQYLRHHEYIHTGEKPYECKVCGKHFRQEQVLKTHMKVHDKPPRPPGK
disco	CG9908	KPRRWGSPPINLAGQFINPATGKKRVQCSICFKTFCDKGALKIHFSAVHLREMHKCTVEGCNMVFSSRRSRNRHSANPNPKLHSPHIRRKISPHDGRTAQQ
disco-r-F1-2	CG32577	GGAGGNGGSVGGGGGKRQWGSMPANLGTQFINPVTGKKRVQCNVCLKTFCDKGALKIHFSAVHLREMHKCTVDGCSMMFSSRRSRNRHSANPNPKLHSPHLRRKISPHDGRSAQPHPLLLQAPNGLMAGLAPFGSFPLLTPPPDLRHHAMGGSGA
esg-F3-5	CG3758	TLPCKCNLCGKAFSRPWLLQGHIRTHTGEKPFSCQHCHRAFADRSNLRAHLQTHSDIKKYSCTSCSKTFSRMSLLTKHSEGGCPGGS
fru-PI	CG14307	NRRDHNIDYSTLFVQLSGTLPTLYRCVSCNKIVSNRWHHANIHRPQSHECPVCGQKFTRRDNMKAHCKIKHADIKDRFFSHYVH
gl	CG7672	GEMKPNLCRLCGKTYARPSTLKTHLRTHSGERPYRCPDCNKSFSQAANLTAHVRTHTGQKPFRCPICDRRFSQSSSVTTHMRTHSGERPYRCSSCKKSFSDSSTLTKHLRIHSGEKPYQCKLCLLRFSQSGNLNRHMRVHGNNNS
hb	CG9786	KMKNYKCKTCGVVAITKVDFWAHTRTHMKPDKILQCPKCPFVTEFKHHLEYHIRKHKNQKPFQCDKCSYTCVNKSMLNSHRKSHSSVYQYRCADCDYATKYCHSFKLHLRKYGHKPGMVLDEDGTPNPSLVIDVYGTRRGPKSKNGGPIASGGSGSGSRKSNVAAVAPQQQQSQPAQPVATSQLSAALQGFPLVQGNSAPPAASPVLPLPASPAKSVASVEQTPSLPSPANLLPPLASLLQQNRNMAFFPYWNLNLQMLAAQQQAAVLAQLSPRMREQLQQQNQQQSDNEEEEQDDEYERKSVDSAMDLSQGTPVKEDEQQQQPQQPLAMNLKVEEEATPLMSSSNASRRKGRVLKLDTLLQLRSEAMTSPEQLKVPSTPMPTASSPIAGRKPMPEEHC…
her	CG4694	KFRCSVDRCPYRTNRPYNLARHEESHIGITQSKLYGCPVCVYNTDKASNLKRHVSIKHPGCKKRPPEAQHKDRNAKLQCLVMGCRYETNRPYDLKRHLMVHNNPEKSHRTFKCSLCTYSSDRKANLKRHHELRHSG
hkb	CG9768	KFKCPNCDVAFSNNGQLKGHIRIHTGERPFKCDVNTCGKTFTRNEELTRHKRIHTGLRPYPCSACGKKFGRRDHLKKHMKTHMPQE
jim-F1-9	CG11352	HKNKPHSDLRLFKCLTCGKDFKQKSTLLQHDRIHTDARPFPCSECGKRFRQQSHLTQHLRIHANEKPFTCPYCSRSFRQRAILNQHIRIHSGEKPFACPECGKHFRQKAILNQHVRTHQDVSPHLIFKNGPHPTLWPSDVPFPGE
ken	CG5575	VREYRCEYCGKQFGMSWNLKTHLRVHTGEKPFACRLCVAMFKQKAHLLKHLCSVHRNVITTTNGADTENRYSCCFCSMCFESVQELVRHLSGHHNNLLLTKNLRE
klu	CG12296	SPTTKETVAWRYNLDVSPVVEEMPPGSDVAYVCPTCGQMFSLHDRLAKHMASRHKSRNPANDIAKAYSCDVCRRSFARSDMLTRHMRLHTGVKPYTCKVCGQVFSRSDHLSTHQRTHTGEKPYKCPQCPYAACRRDMITRHMRTHTR
Kr	CG3340	KDPSRDKSFTCKICSRSFGYKHVLQNHERTHTGEKPFECPECHKRFTRDHHLKTHMRLHTGEKPYHCSHCDRQFVQVANLRRHLRVHTGERPYTCEICDGKFSDSNQLKSHMLVHNGEKPFECERCHMKFRRRHHLMNHKCGIQ
l(3)neo38	CG6930	GEIRETKALDGSTLYCCPECQMAYPDRSLIEQHVISHAVERRFVCDICNAALKRKDHLTRHKLSHIPDRPHVCNICMKSFKRKEQLTLHIVIHSGEKKHVCIECGKGFYRKDHLRKHTRSHIARRVKSEVSAQN
lmd	CG4677	LICRWTGCDEEFPHQQAFVEHIEKCHVDVRKGEDFSCFWLDCPRRYKPFNARYKLLIHMRVHSGEKPNKCPFPGCNKAFSRLENLKIHQRSHTGERPYGCQYKGCLKAFSNSSDRAKHQRTHYDTKPYACQLPGCTKRYTDPSSLRKHVKNH
lola_PK	CG12052	DFVLTWYQHACDQCGKSYKTRKSLSRHRRFECRFTTERPIFQCPSCNYAAKRSDNLTKHIKTHFAKMKKD
lola-PA	CG12052	GNGGQEESFTCPQCYRTYRRHGTLRRHLRQECGKGKSMVCSVCGHRTKRADHLRQHVRKKHPEIAMRSLFKRQQ
lola-PC	CG12052	GGADNGAGHPCPVCGRVYKLKSSLRNHQKWECGKEPQFQCPFCVYRAKQKMHIGRHMERMHKEKFKLEDVK
lola-PD	CG12052	DQDQYKERFHCAVCNKSYLRKRHLQRHMRDECIGIPPRFNCEFCSSRFRRKYHMVRHLVSKHGIPPAIAQMT
lola-PF	CG12052	QALIRDYWYELKFSDLFKFINPDGRYQCPRFNCLKSYKDASSLQRHIRYECGGQKKFRCLMCGKAFSQSSHLKRHLESGVCVK
lola-PG	CG12052	FRNLEFTLSDYGGSSSNGSTTSPNGIGLDGEPVYECRHCGKKYRWKSTLRRHENVECGGKEPSHQCPYCPYKSKQRGNLGVHVRKHHTDLPQLPSKRRSK
lola-PI	CG12052	DPSGMTYELSLSDSSLGPCDDPESRYVCRHCGKKYRWKSTLRRHENVECGGKEPCHPCPYCSYKAKQRGNLGVHVRKHHPEKPQLESKRGR
lola-PJ	CG12052	GGGGGGGAYACDRCGNTYARPHSLNRHVRFECGVEPKFECPICHKKSKHKHNLVLHMRTHQHR
lola-PK	CG12052	DFVLTWYQHACDQCGKSYKTRKSLSRHRRFECRFTTERPIFQCPSCNYAAKRSDNLTKHIKTHFAKMKKD
lola-PL	CG12052	ADMRDDGKLQCPQCPNAYTRLSALKRHLEFECGMLENFRCQVCDAGFKRKDSLNRHCKVKKHNTK
lola-PO	CG12052	GGLSRDSFMQCKHCNRYYKSHQKLQEHVRKYCLKQKKYKCVSCEYRSRRKDHVLRHAKRKHCMLYEQSRDDE
lola-PP	CG12052	YNADIEKPWVCRNCNRTYKWKNSLKCHLKNECGLPPRYFCSKMCGYATNVHSNLKRHLNTKCRDREKDADDE
lola-PQ	CG12052	SSDAASAPFVCQTCGRRYQVLGTLRRHMRKECNQPKKYVCRMCERRFHYNFKLQDHYYYVHKGVQKRE
lola-PT	CG12052	NVSPSNNSHICPRCEKAYTYKKNLSRHLRYECGQLPTEKCRHCSYVARYKHSLNMHVKTQHPEQISDTFAG
lola-PU	CG12052	NVSPSNNSHICPRCEKAYTYKKNLSRHLRYECGQLPTEKCRHCSYVARYKHSLNMHVKTQHPEQISDTFAG
lola-PW	CG12052	TLQPDDCKYACNVCGKTYKIKGSLKRHKNYECGVEPNLKCPHCPHKCKYRSDLRKHMNQKHADSGEAILAT
lola-PY	CG12052	FVRHGPKNQLLCQCGRYYNTLSRLMLHQREECQDFKRFQCDFCLKWFKRRSHLNRHKKLHDAELFLEPLS
luna	CG33473	RIHKCQFLGCKKVYTKSSHLKAHQRTHTGEKPYKCSWEGCEWRFARSDELTRHYRKHTGAKPFKCRNCDRCFSRSDHLALHMKRH
odd	CG3851	SSRPKKQFICKYCNRQFTKSYNLLIHERTHTDERPYSCDICGKAFRRQDHLRDHRYIHSKDKPFKCSDCGKGFCQSRTLAVHKVTHLEEGPHKCPICQRSFNQRANLKSHLQSHSEQS
opa	CG1133	QCLWIDPDQPGLVPPGGRKTCNKVFHSMHEIVTHLTVEHVGGPECTTHACFWVGCSRNGRPFKAKYKLVNHIRVHTGEKPFACPHPGCGKVFARSENLKIHKRTHTGEKPFKCEHEGCDRRFANSSDRKKHSHVHTSDKPYNCRINGCDKSYTHPSSLRKHMKVHGNVDEKSPSH
ovo	CG6824	SGNNKFVCRVCMKTFSLQRLLNRHMKCHSDIKRYLCTFCGKGFNDTFDLKRHTRTHTGVRPYKCNLCEKSFTQRCSLESHCQKVHSVQHQYAYKERRAKMYVCEECGHTTCEPEVHYLHLKNNHPFSPALLKFYDKRHFKFTNSQFANNLLGQ
pad	CG10309	LICPTCKREFKKKEHLTQHVKLHAGLRPFKCSEEGCDKTFSRKEHLSRHLVSHSGQKMYTCEVCKKPFSRKDNLNKHRRIHTQTSTETLYCCDVCNKNFATKLHYEKHREMH
peb-F1-3	CG12212	KYLCPICEVVSATPHEFTNHIRCHNYANGDTENFTCRICSKVLSSASSLDRHVLVHTGERPFNCRYCHLTFTTNGNMHRHMRTHKQ
peb-F5-7	CG12212	FPCKLCTAVFPNLRALKGHNRVHLGAVGPAGPFRCNMCPYAVCDKAALVRHMRTHNGDRPYECAVCNYAFTTKANCERHLRNRHGKTSR
pho	CG17743	KIACPHKGCNKHFRDSSAMRKHLHTHGPRVHVCAECGKAFVESSKLKRHQLVHTGEKPFQCTFEGCGKRFSLDFNLRTHVRIHTGDRPFVCPFDACNKKFAQSTNLKSHILTHAKAKR
phol	CG3445	PKFRCTHRGCNKEFRNHSAMRKHMHTHGPRGHVCNVCGKSFVESSKLKRHQLVHTGEKPFECTFEGCGKRFSLDFNLRTHVRIHTGDRPYHCPIDGCSKCFAQSTNLKSHMLTHTKPKRKWPRAPQVS
rn	CG42277	GSGRKYQCKMCPQIFSSKADLQLHTQIHMREAKPYKCTQCSKAFANSSYLSQHTRIHLGIKPYRCEICQRKFTQLSHLQQHIRTHTGDKPYKCRHPGCQKAFSQLSNLQSHSRCHQTDKPFKCNSCYKCFSDEPSLLEHIPKHKESKHLKTHICQYCGKSYTQETYLTKHMQKHAERTDKR
salr-F3-5	CG4881	PNQCIFCQKVMSCRSSLQMHIRTHTGERPFRCKICGRAFATKGNLKAHMSIHKIKPPMRSQFKCPVCHQKFSNGIILQQHIRIHTMD
scrt	CG1130	GEIRETKALDGSTLYCCPECQMAYPDRSLIEQHVISHAVERRFVCDICNAALKRKDHLTRHKLSHIPDRPHVCNICMKSFKRKEQLTLHIVIHSGEKKHVCIECGKGFYRKDHLRKHTRSHIARRVKSEVSAQN
sens	CG32120	YQGENEEKRSGRNFQCKQCGKSFKRSSTLSTHLLIHSDTRPYPCQYCGKRFHQKSDMKKHTYIHTGEKPHKCTVCLKAFSQSSNLITHMRKHTGYKPFGCHLCDQSFQRKVDLRRHRESRHEEA
sens2	CG31632	MAAKWPGLHQFSDLYSCMKCEKMFSTPHGLEVHSRRTHHGKKPYACELCNKTFGHEVSLSQHRAVHNVEKVFECKQCGKRFKRSSTLSTHLLIHSDTRPYPCNYCGKRFHQKSDMKKHTYIHTGEKPHKCQVCGKAFSQSSNLITHSRKHTGYKPFSCKLCHKAFQRKVDLRRHKETQHTDLRVHLGKVD
shn-F1-2	CG7734	RYVCQYCNLICAKPSVLEKHIRAHTNERPYPCDTCGIAFKTKSNLYKHCRSRSHAARAR
sna	CG3956	KNYRFKCDECQKMYSTSMGLSKHRQFHCPAAECNQEKKTHSCEECGKLYTTIGALKMHIRTHTLPCKCPICGKAFSRPWLLQGHIRTHTGEKPFQCPDCPRSFADRSNLRAHQQTHVDVKKYACQVCHKSFSRMSLLNKHSSSNCTIT
sob	CG3242	QRSKKQFICKFCNRQFTKSYNLLIHERTHTDERPYSCDICGKAFRRQDHLRDHRYIHSKEKPFKCAECGKGFCQSRTLAVHKILHMEESPHKCPVCNRSFNQRSNLKTHLLTHTDIKPYNCASCGKVFRRNCDLRRHSLTHNLS
Sp1	CG1343	YAGRATCDCPNCQEAERLGPAGVHLRKKNIHSCHIPGCGKVYGKTSHLKAHLRWHTGERPFVCNWLFCGKRFTRSDELQRHLRTHTGEKRFACPVCNKRFMRSDHLAKHVKTHNGTA
sqz	CG5557	DQAKPYKCGSCSKSFANSSYLSQHTRIHLGIKPYRCEICQRKFTQLSHLQQHIRTHTGDKPYKCRHAGCPKAFSQLSNLQSHSRCHQTDKPFKCNSCYKCFSDEMTLLEHIPKHKDSKHLKTHICNLCGKSYTQETYLQKHLQKHAEKAEK
sr	CG7847	QQSTVPLKLVPVKPRKYPNRPSKTPVHERPYACPVENCDRRFSRSDELTRHIRIHTGQKPFQCRICMRSFSRSDHLTTHIRTHTGEKPFSCDICGRKFARSDEKKRHAKVHLKQRIKKE
sug	CG3850	FVCNWTDCDRVFDTLDALAQHVTQRHAIASLTDGLYYCRWRGCQRSERGFNARYKMLVHTRTHTKEKPHRCHLCEKSFSRAENLKIHIRSHSGEKPYKCSFEGCQKAYSNSSDRFKHTRTHSMEKPYMCKVAGCQKRYTDPSSLRKHVKTFKHSIHLIASQ
ttk-PA	CG1856	KRPIQRRRVRRKAQSTLDDQAEHLTEMSVRGLDLFRYASVVEGVYRCTECAKENMQKTFKNKYSFQRHAFLYHEGKHRKVFPCPVCSKEFSRPDKMKNHLKMTHENFTPPKDIGAFSPLKYLISAAAAGDMHAT
ttk-PF	CG1856	TPSVKTKLNLSSNVGEGEAEGSVRDYCTKEGEHTYRCKVCSRVYTHISNFCRHYVTSHKRNVKVYPCPFCFKEFTRKDNMTAHVKIIHKIENPS
vfl	CG12701	KRRRNSSVGSTSPHSTTLPSGRIKCLECDKEFTKNCYLTQHNKSFHSGEYPFRCQKCGKRFQSEDVYTTHLGRHRTQDKPHKCELCPKQFHHKTDLRRHVEAIHTGLKQHMCDICEKGFCRKDHLRKHLETHNRPRVVGKK
wor	CG4158	LKIKSSNDLYYQCQQCNKCYATYAGLVKHQQTHAYESTEYKIIRSQPGGSGAIVDQTEFCTDQASALIQAANVASAQSMQKPVGVPRYHCQDCGKSYSTYSGLSKHQQFHCPSAEGNQVKKVFSCKNCDKTYVSLGALKMHIRTHTLPCKCPICGKAFSRPWLLQGHIRTHTGEKPFSCQHCNRAFADRSNLRAHMQTHSDVKKYSCPTCTKSFSRMSLLAKHLQSGCQT
