# Supplementary material for: Global analysis of Drosophila Cys2-His2 zinc finger proteins reveals a multitude of novel recognition motifs and binding determinants
Source: HighWire-hosted journal article supplement (doi:10.1101/gr.151472.112), 2013-03-07
Supplement: Supplemental_Table_4.xlsx [file Supplemental_Table_4.xlsx]

## Sheet: 1FM_dmel_DNAcode_triplet_breakd
Supplemental Table 4. Single finger – DNA subsite combinations derived from characterized 83 Cys2-His2 ZFPs from D. melanogaster .
Triplet	-1	1	2	3	4	5	6	Determinants	Gene	Finger	dataset	strand	position in motif	Finger Amino Acid Sequence
AAT	E	Q	R	V	F	R	Q	>ERVQ	ab	F1	CG32830_SOLEXA_5.pfm	strand=1	position in motif=11	MLPCPLCETPLEQRVFRQHLDRH
ACA	Q	S	S	T	L	T	N	>QSTN	Aef1	F2	aef1_SOLEXA_5.pfm	strand=1	position in motif=9	YKCNVCDKTFRQSSTLTNHLKIH
ACA	Q	L	S	T	L	A	N	>QSTN	Aef1	F3	aef1_SOLEXA_5.pfm	strand=1	position in motif=6	YNCNFCPKHFRQLSTLANHVKIH
AAG	Q	L	S	N	L	K	V	>QSNV	Blimp-1	F1	Blimp-1_SOLEXA_5.pfm	strand=1	position in motif=12	YECNVCCKTFGQLSNLKVHLRTH
TGA	Q	L	A	H	L	Q	K	>QAHK	Blimp-1	F2	Blimp-1_SOLEXA_5.pfm	strand=1	position in motif=9	FKCNVCTKSFTQLAHLQKHHLVH
AAG	S	T	S	N	L	K	T	>SSNT	Blimp-1	F3	Blimp-1_SOLEXA_5.pfm	strand=1	position in motif=6	HQCDICKKRFSSTSNLKTHLRLH
TAG	K	S	Y	N	L	L	I	>KYNI	bowl	F1	bowl_SOLEXA_5.pfm	strand=1	position in motif=9	FICKFCNRQFTKSYNLLIHERTH
CRG	R	Q	D	H	L	R	D	>RDHD	bowl	F2	bowl_SOLEXA_5.pfm	strand=1	position in motif=6	YSCDICGKAFRRQDHLRDHRYIH
GCG	R	S	D	E	L	Q	R	>RDER	btd	F2	btd_NAR.pfm	strand=1	position in motif=6	FLCLTCGKRFSRSDELQRHGRTH
GGG	R	S	D	H	L	S	K	>RDHK	btd	F3	btd_NAR.pfm	strand=1	position in motif=3	YACPICSKKFSRSDHLSKHKKTH
GCG	R	S	D	E	L	A	R	>RDER	bteb2	F2	Bteb2_SOLEXA_2.5.pfm	strand=-1	position in motif=8	YVCSWPDCVWRFSRSDELARHKRSH
GGG	R	S	D	H	L	T	K	>RDHK	bteb2	F3	Bteb2_SOLEXA_2.5.pfm	strand=-1	position in motif=5	YKCDYCSKCFARSDHLTKHRKVH
GTA	Q	S	N	T	L	K	Q	>QNTQ	Cf2	F2	Cf2-PB_SOLEXA_5.pfm	strand=1	position in motif=7	YTCSYCGKSFTQSNTLKQHTRIH
TAT	V	K	D	Y	L	T	K	>VDYK	Cf2	F3	Cf2-PB_SOLEXA_5.pfm	strand=1	position in motif=4	FHCGYCEKSFSVKDYLTKHIRTH
TAC	V	R	E	Q	L	R	K	>VEQK	CG10267	F2	CG10267-F1-3_SOLEXA_5.pfm	strand=1	position in motif=10	YACELCDAKFQVREQLRKHMYSH
GTT	Y	A	H	S	L	T	K	>YHSK	CG10267	F4	CG10267_SOLEXA_5.pfm	strand=1	position in motif=10	YVCKVCDKAFAYAHSLTKHELIH
AGT	L	L	H	H	M	R	Q	>LHHQ	CG10267	F5	CG10267_SOLEXA_5.pfm	strand=1	position in motif=7	YRCDYCNKDFRLLHHMRQHEETKLH
TAG	R	A	D	Y	L	S	K	>RDYK	CG11071	F3	CG11071_SOLEXA_5.pfm	strand=-1	position in motif=7	YHCESCGKCFARADYLSKHLTTHIH
TGG	K	S	S	H	L	K	A	>KSHA	CG12029	F1	CG12029_SOLEXA_5.pfm	strand=1	position in motif=9	HHCDFVGCSKVYTKSSHLKAHQRIH
GTG	R	S	D	E	L	T	R	>RDER	CG12029	F2	CG12029_SOLEXA_5.pfm	strand=1	position in motif=6	YTCQWPECEWRFARSDELTRHYRKH
GAA	S	V	N	A	L	R	R	>SNAR	CG12236	F1	CG12236_SOLEXA_5.pfm	strand=-1	position in motif=9	LNCSFCGRPLKSVNALRRHIASRH
GAA	T	T	V	N	L	W	R	>TVNR	CG12236	F1	CG12236-PB_SOLEXA_2.5.pfm	strand=-1	position in motif=6	TECQFCKMVITTVNLWRHIRTQH
RAT	T	K	W	S	L	S	T	>TWST	CG12236	F2	CG12236_SOLEXA_5.pfm	strand=-1	position in motif=6	EHECFICMKSFKTKWSLSTHNSRFH
YTG	N	K	Y	S	L	R	E	>NYSE	CG12236	F2	CG12236-PB_SOLEXA_2.5.pfm	strand=-1	position in motif=3	RKCDMCNKNFKNKYSLREHIRISH
TTG	S	M	P	A	L	A	M	>SPAM	CG12605	F2	CG12605_SOLEXA_5.pfm	strand=-1	position in motif=8	KKCNTCGKAYVSMPALAMHLLTH
CTG	R	P	W	L	L	Q	G	>RWLG	CG12605	F3	CG12605_SOLEXA_5.pfm	strand=-1	position in motif=5	HSCDICGKLFSRPWLLQGHLRSH
CAC	D	R	S	N	L	R	A	>DSNA	CG12605	F4	CG12605_SOLEXA_5.pfm	strand=-1	position in motif=2	YACVHCGKAFADRSNLRAHMQTH
CTG	R	P	W	L	L	Q	G	>RWLG	CG17181	F3	CG17181_SOLEXA_5.pfm	strand=-1	position in motif=7	CECQFCGKRFSRPWLLQGHIRTH
CAC	D	K	S	N	L	R	A	>DSNA	CG17181	F4	CG17181_SOLEXA_5.pfm	strand=-1	position in motif=4	FKCGVCEKAFADKSNLRAHIQTH
AAA	Q	L	S	H	V	Q	Q	>QSHQ	CG2052	F2	CG2052_SOLEXA_2.5.pfm	strand=-1	position in motif=9	YKCSYCDRRFKQLSHVQQHTRLH
RAA	Q	L	S	N	L	Q	Q	>QSNQ	CG2052	F3	CG2052_SOLEXA_2.5.pfm	strand=-1	position in motif=6	YKCHLPDCGRAFIQLSNLQQHLRNH
TGG	K	S	S	H	L	R	S	>KSHS	CG3065	F1	CG3065_F1-5_SOLEXA_2.5.pfm	strand=1	position in motif=9	FVCPYDNCTKSYGKSSHLRSHLTWH
GCG	R	S	D	E	L	N	R	>RDER	CG3065	F2	CG3065_F1-5_SOLEXA_2.5.pfm	strand=1	position in motif=6	FVCSEPKCGKGFTRSDELNRHLRTH
KGG	R	S	D	H	L	T	K	>RDHK	CG3065	F3	CG3065_F1-5_SOLEXA_2.5.pfm	strand=1	position in motif=3	FECIQCTKKFSRSDHLTKHLATH
AAY	A	H	Y	N	L	T	R	>AYNR	CG31670	F1	CG31670_SOLEXA_5.pfm	strand=-1	position in motif=11	FSCLECGKVFNAHYNLTRHMPVH
AGC	Q	A	S	T	L	C	R	>QSTR	CG31670	F2	CG31670_SOLEXA_5.pfm	strand=-1	position in motif=8	FVCKVCGKGFRQASTLCRHKIIH
AWG	R	S	S	T	L	N	T	>RSTT	CG31670	F3	CG31670_SOLEXA_5.pfm	strand=-1	position in motif=5	HKCQTCGKAFNRSSTLNTHSRIH
GGT	Q	K	H	H	L	V	R	>QHHR	CG31782	F10	CG31782_SOLEXA_5.pfm	strand=1	position in motif=6	HQCPLCYWAFKQKHHLVRHMIVH
ACW	Q	W	G	D	L	K	Y	>QGDY	CG3407	F4	CG3407_SOLEXA_2.5.pfm	strand=1	position in motif=22	FKCDKCEFQFRQWGDLKYHIISRH
TTG	R	R	Y	S	L	V	V	>RYSV	CG3407	F5	CG3407_SOLEXA_2.5.pfm	strand=1	position in motif=19	HMCEFCGKSFSRRYSLVVHRRIH
ACA	Q	L	T	T	L	R	N	>QTTN	CG4360	F1	CG4360_F1-3_SOLEXA_2.5.pfm	strand=-1	position in motif=11	KKQCHVCKNKFRQLTTLRNHMKIH
ACA	Q	I	S	T	L	T	N	>QSTN	CG4360	F2	CG4360_F1-3_SOLEXA_2.5.pfm	strand=-1	position in motif=8	YKCKHCDKAFRQISTLTNHVKIH
ACA	Q	Q	S	T	R	I	N	>QSTN	CG4360	F3	CG4360_F1-3_SOLEXA_2.5.pfm	strand=-1	position in motif=5	FTCNICAKDFRQQSTLINHIKTH
AAC	Q	T	P	Q	L	A	R	>QPQR	CG4854	F2	CG4854_SOLEXA_5.pfm	strand=-1	position in motif=9	HECEICHKRFRQTPQLARHMNTH
GCC	D	P	S	T	L	I	K	>DSTK	CG4854	F3	CG4854_SOLEXA_5.pfm	strand=-1	position in motif=6	YKCDYCDSRFADPSTRIKHQRIH
GTT	Y	S	N	V	L	R	V	>YNVV	CG4854	F4	CG4854_SOLEXA_5.pfm	strand=-1	position in motif=3	YKCEFCSRSFGYSNVLRVHLKTH
KGG	K	T	S	H	L	R	A	>KSHA	CG5669	F1	CG5669_SOLEXA_5.pfm	strand=1	position in motif=9	HICHITGCHKVYGKTSHLRAHLRWH
GCG	R	S	D	E	L	Q	R	>RDER	CG5669	F2	CG5669_SOLEXA_5.pfm	strand=1	position in motif=6	FVCSWAFCGKRFTRSDELQRHRRTH
KGG	R	S	D	H	L	S	R	>RDHR	CG5669	F3	CG5669_SOLEXA_5.pfm	strand=1	position in motif=3	FQCQECNKKFMRSDHLSKHIKTH
GGG	R	K	D	H	L	T	R	>RDHR	CG7368	F2	CG7368_SOLEXA_2.5.pfm	strand=1	position in motif=10	YVCDICQASLKRKDHLTRHKQSH
KGG	R	K	D	H	L	R	K	>RDHK	CG7368	F4	CG7368_SOLEXA_2.5.pfm	strand=1	position in motif=4	HQCGECGKGFYRKDHLRKHTRSH
TGS	H	K	V	A	L	Y	K	>HVAK	CG7928	F4	CG7928_SOLEXA_5.pfm	strand=-1	position in motif=7	YQCDVCSKRFVHKVALYKHKMIH
GGM	T	K	A	H	M	E	R	>TAHR	CG7928	F5	CG7928_SOLEXA_5.pfm	strand=-1	position in motif=4	LECQVCGFKTRTKAHLERHMRSH
CAG	Q	M	Y	N	Y	K	A	>QYNA	CG7928	F6	CG7928_SOLEXA_5.pfm	strand=-1	position in motif=1	FACPVCNKRFSQMYNMKAHLREH
CYC	S	K	Q	A	L	K	V	>SQAV	CG8319	F5	CG8319_SOLEXA_2.5.pfm	strand=-1	position in motif=9	HACPFCVSNFRSKQALKVHIRIH
GAC	D	N	N	N	L	A	K	>DNNK	CG8319	F6	CG8319_SOLEXA_2.5.pfm	strand=-1	position in motif=6	YQCPHCPKTFSDNNNLAKHRRRH
GGT	E	K	H	H	L	K	R	>EHHR	CG8319	F7	CG8319_SOLEXA_2.5.pfm	strand=-1	position in motif=3	YKCSICLQDFREKHHLKRHFLGKH
TGG	K	S	S	H	L	K	A	>KSHA	CG9895	F1	CG9895_SOLEXA_5.pfm	strand=1	position in motif=7	HKCDTEGCDKVYTKSSHLKAHKRTH
GYG	R	S	D	E	L	T	R	>RDER	CG9895	F2	CG9895_SOLEXA_5.pfm	strand=1	position in motif=4	YVCTWEGCIWRFARSDELTRHYRKH
CAT	Y	E	T	N	L	R	A	>YTNA	chinmo	F1	chinmo.pfm	strand=-1	position in motif=8	LKCLYCDRLYGYETNLRAHIRQRH
GTG	R	N	N	T	V	R	R	>RNTR	chinmo	F2	chinmo.pfm	strand=-1	position in motif=5	VPCPFCERTFTRNNTVRRHIAREH
GAC	D	P	S	S	L	R	K	>DSSK	ci	F5	ci_SOLEXA_5.pfm	strand=1	position in motif=1	YICKAPGCTKRYTDPSSLRKHVKTVH
GGG	R	K	E	H	L	A	N	>REHN	crol-F7-16	F7	crol_F7-16_SOLEXA_2.5.pfm	strand=1	position in motif=10	HQCDVCGKKYTRKEHLANHMRSH
GGG	R	K	E	H	F	T	N	>REHN	crol-F7-17	F8	crol_F7-16_SOLEXA_2.5.pfm	strand=1	position in motif=7	FRCEICGKSFSRKEHFTNHILWH
TAT	H	V	S	N	M	K	L	>HSNL	D19B	F10	19B_SOLEXA_5.pfm	strand=-1	position in motif=8	HICPDCGKGFNHVSNMKLHYKVVH
GGG	K	K	Q	Y	L	R	H	>KQYH	D19B	F11	19B_SOLEXA_5.pfm	strand=-1	position in motif=5	DFCCRFCPKRFAKKQYLRHHEYIH
ACC	D	K	G	A	L	K	I	>DGAI	disco	F1	disco_SOLEXA_5.pfm	strand=-1	position in motif=10	VQCSICFKTFCDKGALKIHFSAVH
GTC	S	R	R	S	R	N	R	>SRSR	disco	F2	disco_SOLEXA_5.pfm	strand=-1	position in motif=7	HKCTVEGCNMVFSSRRSRNRHSANPNPKLH
ACC	D	K	G	A	L	K	I	>DGAI	disco-r-F1-2	F1	disco-r-Cl1_SOLEXA_5.pfm	strand=-1	position in motif=9	VQCNVCLKTFCDKGALKIHFSAVH
GTC	S	R	R	S	R	N	R	>SRSR	disco-r-F1-2	F2	disco-r-Cl1_SOLEXA_5.pfm	strand=-1	position in motif=6	HKCTVDGCSMMFSSRRSRNRHSANPNPKLH
CTG	R	P	W	L	L	Q	G	>RWLG	esg	F3	Esg_SOLEXA_F3-5.pfm	strand=-1	position in motif=12	CKCNLCGKAFSRPWLLQGHIRTH
CAC	D	R	S	N	L	R	A	>DSNA	esg	F4	Esg_SOLEXA_F3-5.pfm	strand=-1	position in motif=9	FSCQHCHRAFADRSNLRAHLQTH
TAA	I	V	S	N	R	W	H	>ISVH	fru	F1	fru_SOLEXA_5.pfm	strand=-1	position in motif=15	YRCVSCNKIVSNRWHHANIH
MAG	R	R	D	N	M	K	A	>RDNA	fru	F2	fru_SOLEXA_5.pfm	strand=-1	position in motif=12	HECPVCGQKFTRRDNMKAHCKIKH
GCC	D	S	S	T	L	T	K	>DSTK	gl	F4	gl_SOLEXA_5.pfm	strand=-1	position in motif=4	YRCSSCKKSFSDSSTLTKHLRIH
GAA	Q	S	G	N	L	N	R	>QGNR	gl	F5	gl_SOLEXA_5.pfm	strand=-1	position in motif=1	YQCKLCLLRFSQSGNLNRHMRVH
TTT	N	K	S	M	L	N	S	>NSMS	hb	F3	hb_SOLEXA_5.pfm	strand=1	position in motif=7	FQCDKCSYTCVNKSMLNSHRKSH
TGA	N	N	G	Q	L	K	G	>NGQG	Hkb	F1	hkb_SOLEXA_5.pfm	strand=1	position in motif=8	FKCPNCDVAFSNNGQLKGHIRIH
GCG	R	N	E	E	L	T	R	>REER	Hkb	F2	hkb_SOLEXA_5.pfm	strand=1	position in motif=5	FKCDVNTCGKTFTRNEELTRHKRIH
KGG	R	R	D	H	L	K	K	>RDHK	Hkb	F3	hkb_SOLEXA_5.pfm	strand=1	position in motif=2	YPCSACGKKFGRRDHLKKHMKTH
AAA	Q	Q	S	H	L	T	Q	>QSHQ	jim	F2	jim_F1-9_SOLEXA_2.5.pfm	strand=-1	position in motif=7	FPCSECGKRFRQQSHLTQHLRIH
AAA	Q	R	A	I	L	N	Q	>QAIQ	jim	F3	jim_F1-9_SOLEXA_2.5.pfm	strand=-1	position in motif=4	FTCPYCSRSFRQRAILNQHIRIH
AAG	M	S	W	N	L	K	T	>MWNT	ken	F1	ken_SOLEXA_5.pfm	strand=-1	position in motif=11	YRCEYCGKQFGMSWNLKTHLRVH
WGA	Q	K	A	H	L	L	K	>QAHK	ken	F2	ken_SOLEXA_5.pfm	strand=-1	position in motif=8	FACRLCVAMFKQKAHLLKHLCSVH
GTG	R	S	D	M	L	T	R	>RDMR	klu	F2	klu_SOLEXA_5.pfm	strand=1	position in motif=8	YSCDVCRRSFARSDMLTRHMRLH
KGG	R	S	D	H	L	S	T	>RDHT	klu	F3	klu_SOLEXA_5.pfm	strand=1	position in motif=5	YTCKVCGQVFSRSDHLSTHQRTH
GYG	R	R	D	M	I	T	R	>RDMR	klu	F4	klu_SOLEXA_5.pfm	strand=1	position in motif=2	YKCPQCPYAACRRDMITRHMRTH
GTT	Y	K	H	V	L	Q	N	>YHVN	Kr	F1	kr_SOLEXA_2.5.pfm	strand=-1	position in motif=10	FTCKICSRSFGYKHVLQNHERTH
AGG	R	D	H	H	L	K	T	>RHHT	Kr	F2	kr_SOLEXA_2.5.pfm	strand=-1	position in motif=7	FECPECHKRFTRDHHLKTHMRLH
GGG	R	K	D	H	L	T	R	>RDHR	l(3)neo38	F2	l(3)neo38_SOLEXA_2.5.pfm	strand=1	position in motif=9	FVCDICNAALKRKDHLTRHKLSH
KGG	R	K	D	H	L	R	K	>RDHK	l(3)neo38	F4	l(3)neo38_SOLEXA_2.5.pfm	strand=1	position in motif=3	HVCIECGKGFYRKDHLRKHTRSH
GYT	R	P	H	S	L	N	R	>RHSR	lola	F1	Lola_PJ.pfm	strand=1	position in motif=6	YACDRCGNTYARPHSLNRHVRFEC
GTT	R	H	G	T	L	R	R	>RSAR	lola	F1	lola-PA_SOLEXA_5.pfm	strand=1	position in motif=11	FTCPQCYRTYRRHGTLRRHLRQEC
AAA	L	K	S	S	L	R	N	>LSSN	lola	F1	lola-PC_SOLEXA_5.pfm	strand=1	position in motif=6	HPCPVCGRVYKLKSSLRNHQKWEC
GGG	R	K	R	H	L	Q	R	>RRHR	lola	F1	Lola-PD_SOLEXA_5.pfm	strand=1	position in motif=7	FHCAVCNKSYLRKRHLQRHMRDEC
GTT	D	A	S	S	L	Q	R	>DSSR	lola	F1	lola-PF_SOLEXA_2.5.pfm	strand=-1	position in motif=11	YQCPRFNCLKSYKDASSLQRHIRYEC
GCT	W	K	S	T	L	R	R	>WSTR	lola	F1	Lola-PG.pfm	strand=-1	position in motif=8	YECRHCGKKYRWKSTLRRHENVEC
GCT	W	K	S	T	L	R	R	>WSTR	lola	F1	lola-PI_SOLEXA_2.5.pfm	strand=-1	position in motif=5	YVCRHCGKKYRWKSTLRRHENVEC
GTY	T	L	S	R	L	M	L	>TSRL	lola	F2	lola-PN_SOLEXA_2.5.pfm	strand=1	position in motif=8	LLCQCGRYYNTLSRLMLHQREEC
GTT	V	L	G	T	L	R	R	>VGTR	lola	F1	Lola-PQ.pfm	strand=1	position in motif=8	FVCQTCGRRYQVLGTLRRHMRKEC
GAG	Y	K	K	N	L	S	R	>YKNR	lola	F1	Lola-PT.pfm	strand=1	position in motif=7	HICPRCEKAYTYKKNLSRHLRYEC
GAG	Y	K	K	N	L	S	R	>YKNR	lola	F1	lola-PU_SOLEXA_5.pfm	strand=1	position in motif=8	HICPRCEKAYTYKKNLSRHLRYEC
GCA	I	K	G	S	L	K	R	>IGSR	lola	F1	Lola-PW.pfm	strand=-1	position in motif=6	YACNVCGKTYKIKGSLKRHKNYEC
GTY	T	L	S	R	L	M	L	>TSRL	lola	F1	lola-PY_SOLEXA_5.pfm	strand=1	position in motif=10	LLCQCGRYYNTLSRLMLHQREEC
TAT	H	K	H	N	L	V	L	>HHNL	lola	F2	Lola_PJ.pfm	strand=1	position in motif=3	FECPICHKKSKHKHNLVLHMRTH
TAG	R	S	D	N	L	T	K	>RDNK	lola	F2	Lola_PK.pfm	strand=-1	position in motif=5	FQCPSCNYAAKRSDNLTKHIKTH
GGA	Q	K	M	H	L	G	R	>QMHR	lola	F2	lola-PC_SOLEXA_5.pfm	strand=1	position in motif=3	FQCPFCVYRAKQKMHIGRHMERMH
GGG	R	K	Y	H	M	V	R	>RYHR	lola	F2	Lola-PD_SOLEXA_5.pfm	strand=1	position in motif=4	FNCEFCSSRFRRKYHMVRHLVSKH
GGA	Q	S	S	H	L	K	R	>QSHR	lola	F2	lola-PF_SOLEXA_2.5.pfm	strand=-1	position in motif=8	FRCLMCGKAFSQSSHLKRHLESGVC
AAA	Q	R	G	N	L	G	V	>QGNV	lola	F2	Lola-PG.pfm	strand=-1	position in motif=5	HQCPYCPYKSKQRGNLGVHVRKHH
AAA	Q	R	G	N	L	G	V	>QGNV	lola	F2	lola-PI_SOLEXA_2.5.pfm	strand=-1	position in motif=2	HPCPYCSYKAKQRGNLGVHVRKHH
GTG	R	K	D	S	L	N	R	>RDSR	lola	F2	lola-PL_SOLEXA_2.5.pfm	strand=-1	position in motif=7	FRCQVCDAGFKRKDSLNRHCKVKKH
RGG	R	R	S	H	L	N	R	>RSHR	lola	F3	lola-PN_SOLEXA_2.5.pfm	strand=1	position in motif=5	FQCDFCLKWFKRRSHLNRHKKLH
GGG	R	K	D	H	L	L	R	>RDHR	lola	F2	Lola-PO.pfm	strand=1	position in motif=5	YKCVSCEYRSRRKDHVLRHAKRKHC
GKT	Y	N	F	K	L	Q	D	>YFKD	lola	F2	Lola-PQ.pfm	strand=1	position in motif=5	YVCRMCERRFHYNFKLQDHYYYVH
AGG	R	R	S	H	L	N	R	>RSHR	lola	F2	lola-PY_SOLEXA_5.pfm	strand=1	position in motif=7	FQCDFCLKWFKRRSHLNRHKKLH
TGG	K	S	S	H	L	K	A	>KSHA	luna	F1	luna_SOLEXA_5.pfm	strand=1	position in motif=10	HKCQFLGCKKVYTKSSHLKAHQRTH
GCG	R	S	D	E	L	T	R	>RDER	luna	F2	luna_SOLEXA_5.pfm	strand=1	position in motif=7	YKCSWEGCEWRFARSDELTRHYRKH
TAG	K	S	Y	N	L	L	I	>KYNI	odd	F1	odd_NBT_1.5.pfm	strand=-1	position in motif=6	FICKYCNRQFTKSYNLLIHERTH
CRG	R	Q	D	H	L	R	D	>RDHD	odd	F2	odd_NBT_1.5.pfm	strand=-1	position in motif=3	YSCDICGKAFRRQDHLRDHRYIH
GTT	L	Q	R	L	L	N	R	>LRLR	ovo	F1	ovo_SOLEXA_5.pfm	strand=-1	position in motif=7	FVCRVCMKTFSLQRLLNRHMKCH
MCC	D	T	F	D	L	K	R	>DFDR	ovo	F2	ovo_SOLEXA_5.pfm	strand=-1	position in motif=4	YLCTFCGKGFNDTFDLKRHTRTH
GGG	R	K	E	H	L	S	R	>REHR	pad	F2	pad_SOLEXA_5.pfm	strand=-1	position in motif=20	FKCSEEGCDKTFSRKEHLSRHLVSH
GCT	S	A	S	S	L	D	R	>SSSR	peb-F1-3	F2	peb-1_SOLEXA_2.5.pfm	strand=1	position in motif=9	FTCRICSKVLSSASSLDRHVLVH
GAT	T	N	G	N	M	H	R	>TGNR	peb-F1-3	F3	peb-1_SOLEXA_2.5.pfm	strand=1	position in motif=6	FNCRYCHLTFTTNGNMHRHMRTH
GGC	E	S	S	K	L	K	R	>ESKR	pho	F2	pho_SOLEXA_5.pfm	strand=-1	position in motif=9	VHVCAE—CGKAFVESSKLKRHQLVH
GGC	E	S	S	K	L	K	R	>ESKR	phol	F2	phol_SOLEXA_5.pfm	strand=-1	position in motif=9	HVCNVCGKSFVESSKLKRHQLVH
AAA	Q	L	S	H	L	Q	Q	>QSHQ	rn	F3	rn_SOLEXA_2.5.pfm	strand=-1	position in motif=9	YRCEICQRKFTQLSHLQQHIRTH
TTG	S	M	P	A	L	A	M	>SPAM	scrt	F2	scrt_SOLEXA_2.5_2.pfm	strand=-1	position in motif=9	KKCHTCGKAYVSMPALAMHLLTH
CTG	R	P	W	L	L	Q	G	>RWLG	scrt	F3	scrt_SOLEXA_2.5_2.pfm	strand=-1	position in motif=6	HSCGVCGKLFSRPWLLQGHLRSH
CAC	D	R	S	N	L	R	A	>DSNA	scrt	F4	scrt_SOLEXA_2.5_2.pfm	strand=-1	position in motif=3	YGCAHCGKAFADRSNLRAHMQTH
CRG	R	S	S	T	L	S	T	>RSTT	sens	F1	sens_SOLEXA_5.pfm	strand=-1	position in motif=11	FQCKQCGKSFKRSSTLSTHLLIH
TCA	Q	K	S	D	M	K	K	>QSDK	sens	F2	sens_SOLEXA_5.pfm	strand=-1	position in motif=8	YPCQYCGKRFHQKSDMKKHTYIH
AAA	Q	S	S	N	L	I	T	>QSNT	sens	F3	sens_SOLEXA_5.pfm	strand=-1	position in motif=5	HKCTVCLKAFSQSSNLITHMRKH
TCA	Q	K	S	D	M	K	K	>QSDK	sens2	F4	sens2_SOLEXA_2.5.pfm	strand=-1	position in motif=4	YPCNYCGKRFHQKSDMKKHTYIH
TCC	K	P	S	V	L	E	K	>KSVK	shn-F1-2	F1	shn-F1-2_SOLEXA_2.5.pfm	strand=1	position in motif=7	YVCQYCNLICAKPSVLEKHIRAH
GAT	T	K	S	N	L	Y	K	>TSNK	shn-F1-2	F2	shn-F1-2_SOLEXA_2.5.pfm	strand=1	position in motif=4	YPCDTCGIAFKTKSNLYKHCRSRSH
CTG	R	P	W	L	L	Q	G	>RWLG	sna	F3	sna_SOLEXA_5.pfm	strand=-1	position in motif=5	CKCPICGKAFSRPWLLQGHIRTH
CAC	D	R	S	N	L	R	A	>DSNA	sna	F4	sna_SOLEXA_5.pfm	strand=-1	position in motif=2	FQCPDCPRSFADRSNLRAHQQTH
TAG	K	S	Y	N	L	L	I	>KYNI	sob	F1	sob_SOLEXA_5.pfm	strand=-1	position in motif=9	FICKFCNRQFTKSYNLLIHERTH
CRG	R	Q	D	H	L	R	D	>RDHD	sob	F2	sob_SOLEXA_5.pfm	strand=-1	position in motif=6	YSCDICGKAFRRQDHLRDHRYIH
TAA	Q	R	S	N	L	K	T	>QSNT	sob	F4	sob_F3t5_SOLEXA_5.pfm	strand=-1	position in motif=7	HKCPVCNRSFNQRSNLKTHLLTH
GCG	R	N	C	D	L	R	R	>RCDR	sob	F5	sob_F3t5_SOLEXA_5.pfm	strand=-1	position in motif=4	YNCASCGKVFRRNCDLRRHSLTH
GCG	R	S	D	E	L	Q	R	>RDER	Sp1	F2	Sp1_SOLEXA_2.5.pfm	strand=-1	position in motif=7	FVCNWLFCGKRFTRSDELQRHLRTH
KGG	R	S	D	H	L	A	K	>RDHK	Sp1	F3	Sp1_SOLEXA_2.5.pfm	strand=-1	position in motif=4	FACPVCNKRFMRSDHLAKHVKTH
AAA	Q	L	S	H	L	Q	Q	>QSHQ	sqz	F2	sqz_SOLEXA_5.pfm	strand=-1	position in motif=8	YRCEICQRKFTQLSHLQQHIRTH
MAA	Q	L	S	N	L	Q	S	>QSNS	sqz	F3	sqz_SOLEXA_5.pfm	strand=-1	position in motif=5	YKCRHAGCPKAFSQLSNLQSHSRCH
GYG	R	S	D	E	L	T	R	>RDER	sr	F1	sr_SOLEXA_5.pfm	strand=1	position in motif=9	YACPVENCDRRFSRSDELTRHIRIH
TGG	R	S	D	H	L	T	T	>RDHT	sr	F2	sr_SOLEXA_5.pfm	strand=1	position in motif=6	FQCRICMRSFSRSDHLTTHIRTH
GAC	D	P	S	S	L	R	K	>DSSK	sug	F5	sug_SOLEXA_5.pfm	strand=-1	position in motif=3	YMCKVAGCQKRYTDPSSLRKHVKTFKH
GAY	H	I	S	N	F	C	R	>HSNR	ttk	F1	ttk.pfm	strand=-1	position in motif=12	YRCKVCSRVYTHISNFCRHYVTSH
GGG	R	P	D	K	M	K	N	>RDKN	ttk	F2	ttk_SOLEXA_5.pfm	strand=-1	position in motif=5	FPCPVCSKEFSRPDKMKNHLKMTH
MAG	R	K	D	N	M	T	A	>RDNA	ttk	F2	ttk.pfm	strand=-1	position in motif=9	YPCPFCFKEFTRKDNMTAHVKIIH
GTA	H	K	T	D	L	R	R	>HTDR	vfl	F3	vfl_SOLEXA_5.pfm	strand=1	position in motif=9	HKCELCPKQFHHKTDLRRHVEAIH
CAG	R	K	D	H	L	R	K	>RDHK	vfl	F4	vfl_SOLEXA_5.pfm	strand=1	position in motif=6	HMCDICEKGFCRKDHLRKHLETH
CTG	R	P	W	L	L	Q	G	>RWLG	wor	F4	wor_SOLEXA_2.5.pfm	strand=1	position in motif=5	CKCPICGKAFSRPWLLQGHIRTH
CAG	D	R	S	N	L	R	A	>DSNA	wor	F5	wor_SOLEXA_2.5.pfm	strand=1	position in motif=2	FSCQHCNRAFADRSNLRAHMQTH
