# Supplementary material for: Global analysis of Drosophila Cys2-His2 zinc finger proteins reveals a multitude of novel recognition motifs and binding determinants
Source: HighWire-hosted journal article supplement (doi:10.1101/gr.151472.112), 2013-03-07
Supplement: Supplemental_Table_5.xlsx [file Supplemental_Table_5.xlsx]

## Sheet: Supplemental Table 5.txt
Supplemental Table 5. Recognition helices for all Drosophila single finger –DNA subsite combinations represented in Figure 4.
"No Match" refers to triplets for which a robust recognition helix is not available in our dataset.
triplet/helix	finger specificity	gene	isoform	finger #
AAA
QLSHQQ	AAA	CG2052		F2
QLSNQQ	RAA	CG2052		F3
QQSHTQ	AAA	jim		F2
QRAINQ	AAA	jim		F3
LKSSRN	AAA	lola	PC	F1
QRGNGV	AAA	lola	PG	F2
QRGNGV	AAA	lola	PI	F2
QLSHQQ	AAA	rn		F3
QSSNIT	AAA	sens		F3
QLSHQQ	AAA	sqz		F2
QLSNQS	MAA	sqz		F3
AAC
AHYNTR	AAY	CG31670		F1
QTPQAR	AAC	CG4854		F2
AAG
QLSNKV	AAG	Blimp-1		F1
STSNKT	AAG	Blimp-1		F3
RSSTNT	AWG	CG31670		F3
RRDNKA	MAG	fru	PI	F2
MSWNKT	AAG	ken		F1
RKDNTA	MAG	ttk	PF	F2
AAT
TKWSST	RAT	CG12236	PA	F2
AHYNTR	AAY	CG31670		F1
EQRVRQ	AAT	CG32830		F1
ACA
QSSTTN	ACA	Aef1		F2
QLSTAN	ACA	Aef1		F3
QWGDKY	ACW	CG3407		F4
QLTTRN	ACA	CG4360		F1
QISTTN	ACA	CG4360		F2
QQSTIN	ACA	CG4360		F3
ACC
DKGAKI	ACC	disco		F1
DKGAKI	ACC	disco-r-F1-2		F1
DTFDKR	MCC	ovo		F2
ACG
NO MATCH
ACT
QWGDKY	ACW	CG3407		F4
AGA
QKAHLK	WGA	ken		F2
AGC
QASTCR	AGC	CG31670		F2
AGG
RDHHKT	AGG	Kr		F2
RRSHNR	RGG	lola	PN	F2
RRSHNR	AGG	lola	PY	F2
AGT
LLHHRQ	AGT	CG10267		F5
ATA
NO MATCH
ATC
NO MATCH
ATG
RSSTNT	AWG	CG31670		F3
ATT
NO MATCH
CAA
QLSNQS	MAA	sqz		F3
CAC
DRSNRA	CAC	CG12605		F4
DKSNRA	CAC	CG17181		F4
DRSNRA	CAC	esg		F4
DRSNRA	CAC	scrt		F4
DRSNRA	CAC	sna		F4
DRSNRA	CAC	wor		F5
CAG
RQDHRD	CRG	bowl		F2
QMYNKA	CAG	CG7928		F6
RRDNKA	MAG	fru	PI	F2
RQDHRD	CRG	odd		F2
RSSTST	CRG	sens		F1
RQDHRD	CRG	sob		F2
RKDNTA	MAG	ttk	PF	F2
RKDHRK	CAG	vfl		F4
CAT
YETNRA	CAT	chinmo		F1
CCA
NO MATCH
CCC
SKQAKV	CYC	CG8319		F5
DTFDKR	MCC	ovo		F2
CCG
NO MATCH
CCT
NO MATCH
CGA
NO MATCH
CGC
NO MATCH
CGG
RQDHRD	CRG	bowl		F2
RQDHRD	CRG	odd		F2
RSSTST	CRG	sens		F1
RQDHRD	CRG	sob		F2
CGT
NO MATCH
CTA
NO MATCH
CTC
SKQAKV	CYC	CG8319		F5
CTG
NKYSRE	YTG	CG12236	PB	F2
RPWLQG	CTG	CG12605		F3
RPWLQG	CTG	CG17181		F3
RPWLQG	CTG	esg		F3
RPWLQG	CTG	scrt		F3
RPWLQG	CTG	sna		F3
RPWLQG	CTG	wor		F4
CTT
NO MATCH
GAA
SVNARR	GAA	CG12236	PA	F1
TTVNWR	GAA	CG12236	PB	F1
QLSNQQ	RAA	CG2052		F3
QSGNNR	GAA	gl		F5
GAC
DNNNAK	GAC	CG8319		F6
DPSSRK	GAC	ci		F5
DPSSRK	GAC	sug		F5
HISNCR	GAY	ttk	PF	F1
GAG
YKKNSR	GAG	lola	PT	F1
YKKNSR	GAG	lola	PU	F1
GAT
TKWSST	RAT	CG12236	PA	F2
TNGNHR	GAT	peb-F1-3		F3
TKSNYK	GAT	shn-F1-2		F2
HISNCR	GAY	ttk	PF	F1
GCA
IKGSKR	GCA	lola	PW	F1
GCC
DPSTIK	GCC	CG4854		F3
DSSTTK	GCC	gl		F4
GCG
RSDEQR	GCG	btd		F2
RSDEAR	GCG	bteb2		F2
RSDENR	GCG	CG3065		F2
RSDEQR	GCG	CG5669		F2
RSDETR	GYG	CG9895		F2
RNEETR	GCG	Hkb		F2
RRDMTR	GYG	klu		F4
RSDETR	GCG	luna		F2
RNCDRR	GCG	sob		F5
RSDEQR	GCG	Sp1		F2
RSDETR	GYG	sr		F1
GCT
WKSTRR	GCT	lola	PG	F1
WKSTRR	GCT	lola	PI	F1
RPHSNR	GYT	lola	PJ	F1
SASSDR	GCT	peb-F1-3		F2
GGA
TKAHER	GGM	CG7928		F5
QKMHGR	GGA	lola	PC	F2
QSSHKR	GGA	lola	PF	F2
GGC
TKAHER	GGM	CG7928		F5
ESSKKR	GGC	pho		F2
ESSKKR	GGC	phol		F2
GGG
RSDHSK	GGG	btd		F3
RSDHTK	GGG	bteb2		F3
RSDHTK	KGG	CG3065		F3
KTSHRA	KGG	CG5669		F1
RSDHSR	KGG	CG5669		F3
RKDHTR	GGG	CG7368		F2
RKDHRK	KGG	CG7368		F4
RKEHAN	GGG	crol-F7-16		F7
RKEHTN	GGG	crol-F7-17		F8
KKQYRH	GGG	D19B		F11
RRDHKK	KGG	Hkb		F3
RSDHST	KGG	klu		F3
RKDHTR	GGG	l(3)neo38		F2
RKDHRK	KGG	l(3)neo38		F4
RKRHQR	GGG	lola	PD	F1
RKYHVR	GGG	lola	PD	F2
RRSHNR	RGG	lola	PN	F2
RKDHLR	GGG	lola	PO	F2
RKEHSR	GGG	pad		F2
RSDHAK	KGG	Sp1		F3
RPDKKN	GGG	ttk	PA	F2
GGT
QKHHVR	GGT	CG31782		F10
EKHHKR	GGT	CG8319		F7
YNFKQD	GKT	lola	PQ	F2
GTA
QSNTKQ	GTA	Cf2	PB	F2
HKTDRR	GTA	vfl		F3
GTC
SRRSNR	GTC	disco		F2
SRRSNR	GTC	disco-r-F1-2		F2
TLSRML	GTY	lola	PN	F1
TLSRML	GTY	lola	PY	F1
GTG
RSDETR	GTG	CG12029		F2
RSDETR	GYG	CG9895		F2
RNNTRR	GTG	chinmo		F2
RSDMTR	GTG	klu		F2
RRDMTR	GYG	klu		F4
RKDSNR	GTG	lola	PL	F2
RSDETR	GYG	sr		F1
GTT
YAHSTK	GTT	CG10267		F4
YSNVRV	GTT	CG4854		F4
YKHVQN	GTT	Kr		F1
RLSAKR	GTT	lola	PA	F1
DASSQR	GTT	lola	PF	F1
RPHSNR	GYT	lola	PJ	F1
TLSRML	GTY	lola	PN	F1
VLGTRR	GTT	lola	PQ	F1
YNFKQD	GKT	lola	PQ	F2
TLSRML	GTY	lola	PY	F1
LQRLNR	GTT	ovo		F1
TAA
IVSVWH	TAA	fru	PI	F1
QRSNKT	TAA	sob		F4
TAC
VREQRK	TAC	CG10267		F2
TAG
KSYNLI	TAG	bowl		F1
RADYSK	TAG	CG11071		F3
RSDNTK	TAG	lola	PK	F2
KSYNLI	TAG	odd		F1
KSYNLI	TAG	sob		F1
TAT
VKDYTK	TAT	Cf2	PB	F3
HVSNKL	TAT	D19B		F10
HKHNVL	TAT	lola	PJ	F2
TCA
QKSDKK	TCA	sens		F2
QKSDKK	TCA	sens2		F4
TCC
KPSVEK	TCC	shn-F1-2		F1
TCG
NO MATCH
TCT
NO MATCH
TGA
QLAHQK	TGA	Blimp-1		F2
NNGQKG	TGA	Hkb		F1
QKAHLK	WGA	ken		F2
TGC
HKVAYK	TGS	CG7928		F4
TGG
KSSHKA	TGG	CG12029		F1
KSSHRS	TGG	CG3065		F1
RSDHTK	KGG	CG3065		F3
KTSHRA	KGG	CG5669		F1
RSDHSR	KGG	CG5669		F3
RKDHRK	KGG	CG7368		F4
HKVAYK	TGS	CG7928		F4
KSSHKA	TGG	CG9895		F1
RRDHKK	KGG	Hkb		F3
RSDHST	KGG	klu		F3
RKDHRK	KGG	l(3)neo38		F4
KSSHKA	TGG	luna		F1
RSDHAK	KGG	Sp1		F3
RSDHTT	TGG	sr		F2
TGT
NO MATCH
TTA
NO MATCH
TTC
NO MATCH
TTG
NKYSRE	YTG	CG12236	PB	F2
SMPAAM	TTG	CG12605		F2
RRYSVV	TTG	CG3407		F5
SMPAAM	TTG	scrt		F2
TTT
NKSMNS	TTT	hb		F3
